# Supplementary material for: Diamidocarbene-derived palladium and nickel–sulfur clusters
Source: Royal Society of Chemistry journal article supplement (doi:10.1039/d4cc04582c), 2024-01-01
Supplement: d4cc04582c1.pdf [file d4cc04582c1.pdf]

Electronic Supplementary Information

**Diamidocarbene-derived palladium and nickel–sulfur clusters**

Minji Lee,<sup>ab†</sup> Hyunju Noh<sup>ab†</sup> and Youngsuk Kim<sup>\*abc</sup>

<sup>a</sup> Department of Chemistry, Pusan National University, Busan, Republic of Korea

<sup>b</sup> Institute for Future Earth, Pusan National University, Busan, Republic of Korea

<sup>c</sup> Chemistry Institute for Functional Materials, Pusan National University, Busan,  
Republic of Korea

\*E-mail: [youngsuk.kim@pusan.ac.kr](mailto:youngsuk.kim@pusan.ac.kr)

# Table of contents

|                                                   |     |
|---------------------------------------------------|-----|
| <b>Materials and Methods</b> .....                | S3  |
| <b>Experimental Details</b> .....                 | S4  |
| Synthesis of DAC–CS <sub>2</sub> (L) .....        | S4  |
| Synthesis of L <sub>4</sub> Pd <sub>4</sub> ..... | S4  |
| Synthesis of L <sub>4</sub> Ni <sub>4</sub> ..... | S5  |
| Synthesis of L <sub>4</sub> Ni <sub>3</sub> ..... | S6  |
| <b>NMR</b> .....                                  | S7  |
| General information .....                         | S7  |
| NMR spectra .....                                 | S7  |
| <b>X-ray Crystallography</b> .....                | S13 |
| General information .....                         | S13 |
| Crystal data and structure refinements .....      | S13 |
| Structural data .....                             | S14 |
| <b>UV-Vis Spectroscopy</b> .....                  | S16 |
| General information .....                         | S16 |
| UV-Vis spectra .....                              | S16 |
| <b>DFT Calculation</b> .....                      | S17 |
| General information .....                         | S17 |
| DFT-optimized structural parameters .....         | S17 |
| Coordinates of optimized structures .....         | S19 |
| <b>Cyclic Voltammetry</b> .....                   | S22 |
| <b>References</b> .....                           | S23 |

## Materials and Methods

### 1. General methods

All air- and moisture-insensitive reactions were carried out under an ambient atmosphere. All air- and moisture-sensitive manipulations were performed using oven-dried glassware, including standard Schlenk and glovebox techniques under an atmosphere of nitrogen.

All NMR spectra were recorded using a Bruker Ascend™ 400 MHz spectrometer. Chemical shifts were referenced to the residual solvent peaks.<sup>1</sup> Mass spectrometry (MS) spectra were acquired using a Shimadzu LCMS-2050 single quadrupole mass spectrometer, equipped with a dual ion source combining electrospray ionization (ESI) and atmospheric pressure chemical ionization (APCI). High-resolution mass spectrometry (HRMS) spectra were obtained on a SCIEX ZenoTOF 7600 mass spectrometer, fitted with an electrospray ionization (ESI) source. Elemental analyses were conducted at the GIST Advanced Institute of Instrumental Analysis, using a Thermo Fisher Scientific FlashSmart elemental analyzer.

### 2. Reagents

Diamidocarbene (DAC) was synthesized according to a reference.<sup>2</sup> Carbon disulfide (CS<sub>2</sub>), tris(dibenzylideneacetone)dipalladium(0) (Pd<sub>2</sub>(dba)<sub>3</sub>), bis(cyclooctadiene)nickel(0) (Ni(cod)<sub>2</sub>) and all other chemicals were purchased from commercial sources and used as received unless otherwise specified. 3 Å molecular sieves were activated at 240 °C under a dynamic vacuum overnight prior to use. Anhydrous solvents were purchased from commercial sources and stored over activated 3 Å molecular sieves. Chloroform-*d*<sub>1</sub> (CDCl<sub>3</sub>), Acetonitrile-*d*<sub>3</sub> (CD<sub>3</sub>CN) and Benzene-*d*<sub>6</sub> (C<sub>6</sub>D<sub>6</sub>) were dried using activated 3 Å molecular sieves.

## Experimental Details

### Synthesis of DAC-CS<sub>2</sub> (L)

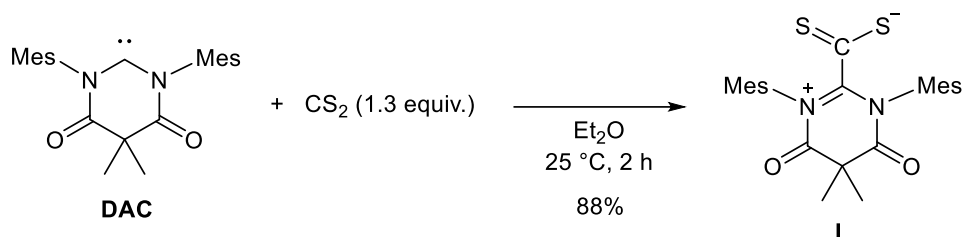

In a N<sub>2</sub> atmosphere glovebox, DAC (50.0 mg, 0.13 mmol) was placed in a 4 mL vial and subsequently dry diethyl ether (1.0 mL) was added to the vial. The solution was stirred at 25 °C, and carbon disulfide (CS<sub>2</sub>, 10.4 μL, 0.17 mmol) was added. The reaction mixture was stirred for 2 hours. Reddish-brown precipitates were formed during the reaction. All volatiles in the reaction mixture were removed *in vacuo*, and the resulting solid was washed with dry diethyl ether (1 × 2 mL) to afford 52.6 mg of the product (88%). Single crystals suitable for X-ray crystallography were obtained from the slow diffusion of pentane into a dichloromethane solution. MS (ESI + APCI): *m/z* calculated for [C<sub>25</sub>H<sub>29</sub>N<sub>2</sub>O<sub>2</sub>S<sub>2</sub> (M + H)<sup>+</sup>] 453.2, found 453.2. <sup>1</sup>H NMR (CDCl<sub>3</sub>, 400 MHz) δ 6.84 (s, 4H), 2.34 (s, 12H), 2.23 (s, 6H), 1.92 (s, 8H) ppm. <sup>1</sup>H NMR (CD<sub>3</sub>CN, 400 MHz) δ 6.91 (s, 4H), 2.36 (s, 12H), 2.26 (s, 6H), 1.91 (s, 6H) ppm. <sup>13</sup>C {<sup>1</sup>H} NMR (CDCl<sub>3</sub>, 100 MHz) δ 228.7, 171.7, 140.8, 136.0, 130.0, 129.4, 51.3, 24.0, 21.1, 19.1 ppm. See **Figure S1** for signal assignments.

### Synthesis of L<sub>4</sub>Pd<sub>4</sub>

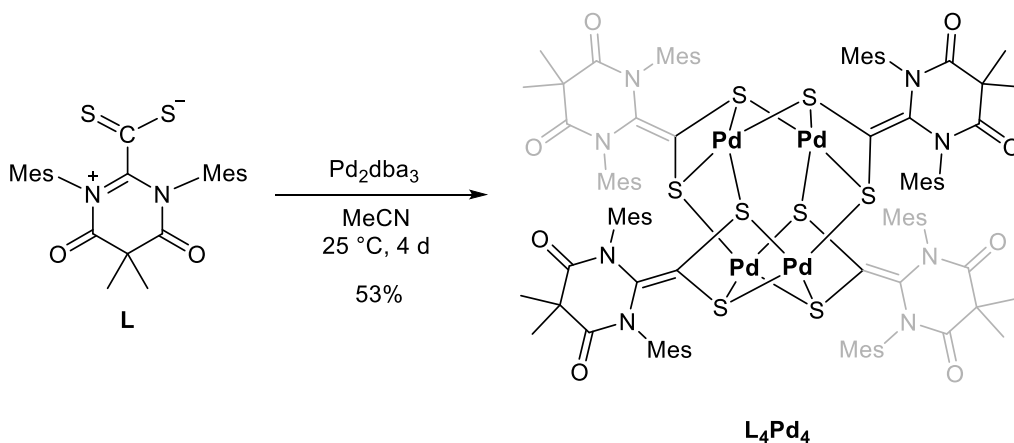

In a N<sub>2</sub> atmosphere glovebox, L (10.0 mg, 0.022 mmol) and Pd<sub>2</sub>dba<sub>3</sub> (10.3 mg, 0.011 mmol) were placed in a 4 mL vial, followed by the addition of dry acetonitrile (0.5 mL). The reaction mixture was allowed to stand overnight. After 4 days, black crystals appeared, which were then washed with dry acetonitrile and dried *in vacuo* to yield the product as an air-sensitive solid (6.6 mg, 53%). Single crystals suitable for X-ray crystallography were obtained from an acetonitrile/ether solution. HRMS (ESI): *m/z* calculated for [C<sub>100</sub>H<sub>112</sub>N<sub>8</sub>O<sub>8</sub>Pd<sub>4</sub>S<sub>8</sub> (M)<sup>+</sup>] 2235.2568, found 2235.2553. <sup>1</sup>H NMR (CDCl<sub>3</sub>, 400 MHz) δ 7.11(s, 4H), 6.92(s, 4H), 6.81(s, 4H), 6.70(s, 4H), 2.42(s, 12H), 2.31(s, 12H), 2.30(s, 12H), 2.18(s, 12H), 2.13(s, 12H), 2.01(s, 12H), 1.74(s, 12H), 1.53(s, 12H) ppm. <sup>1</sup>H NMR (CD<sub>3</sub>CN, 400 MHz) δ 7.19(s, 1H), 6.98(s, 1H), 6.90(s, 1H), 6.76(s, 1H), 2.44(s, 3H), 2.33(s, 3H), 2.28(s, 3H), 2.16(s, 3H), 2.12(s, 3H), 2.01(s, 3H), 1.71(s, 3H), 1.42(s, 3H) ppm. <sup>1</sup>H NMR (C<sub>6</sub>D<sub>6</sub>, 400 MHz) δ 6.88(s, 4H), 6.84(s, 4H), 6.82(s, 4H), 6.63(s, 4H), 2.30(s,

12H), 2.27(s, 12H), 2.26(s, 12H), 2.25(s, 12H), 2.16(s, 12H), 2.09(s, 12H), 1.77(s, 12H), 1.59(s, 12H) ppm.  $^{13}\text{C}\{^1\text{H}\}$  NMR ( $\text{CDCl}_3$ , 100 MHz)  $\delta$  169.1, 169.0, 139.7, 139.2, 138.8, 137.7, 137.5, 135.7, 133.7, 132.5, 131.7, 130.4, 129.7, 129.5, 129.3, 103.8, 77.2, 47.8, 26.9, 22.1, 21.4, 21.3, 20.3, 20.0, 19.7, 19.4 ppm. See **Figure S2** for signal assignments.

### Synthesis of $\text{L}_4\text{Ni}_4$

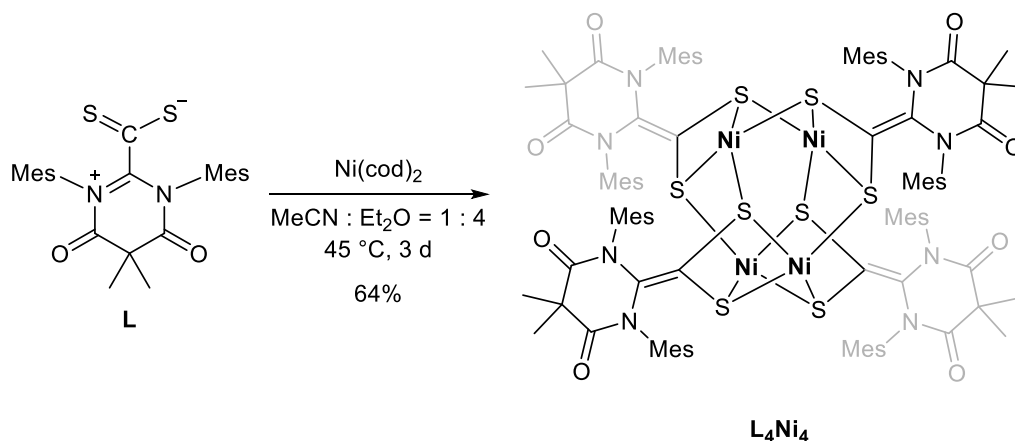

In a  $\text{N}_2$  atmosphere glove box, **L** (15.0 mg, 0.033 mmol) and  $\text{Ni(cod)}_2$  (6.8 mg, 0.025 mmol) were placed in a 4 mL vial. Subsequently, a dry acetonitrile : diethyl ether (1:4) solution (2.5 mL) was added to the vial. The reaction mixture was heated at 45 °C for 1 hour and then filtered through a thin pad of Celite to remove any insoluble material. The resulting filtrate was further heated at 45 °C for 3 days. After 3 days, small brown crystals appeared, which were collected and dried *in vacuo*, yielding the product as an air-sensitive solid (8.1 mg, 64%). Single crystals suitable for X-ray crystallography were obtained from an acetonitrile/diethyl ether solution. Anal. Calcd for  $\text{C}_{100}\text{H}_{112}\text{Ni}_4\text{N}_8\text{O}_8\text{S}_8$ : C, 58.72; H 5.52; N, 5.48. Found: C, 58.44; H 5.52; N, 5.93.  $^1\text{H}$  NMR ( $\text{CD}_3\text{CN}$ , 400MHz)  $\delta$  7.27 (s, 4H), 7.18 (s, 4H), 7.05 (s, 4H), 6.73 (s, 4H), 2.43 (s, 12H), 2.42 (s, 12H), 2.17 (s, 24H), 2.10 (s, 12H), 1.949 (s, 12H), 1.69 (s, 12H), 1.39 (s, 12H) ppm.  $^{13}\text{C}\{^1\text{H}\}$  NMR ( $\text{CD}_3\text{CN}$ , 100 MHz)  $\delta$  169.7, 169.5, 140.5, 140.4, 139.3, 138.6, 138.4, 137.1, 134.1, 133.5, 133.3, 131.2, 130.4, 130.3, 130.0, 96.0, 48.4, 27.2, 22.9, 21.7, 21.5, 20.5, 20.4, 20.2, 19.7 ppm. See **Figure S3** for signal assignments.

Synthesis of  $L_4Ni_3$ 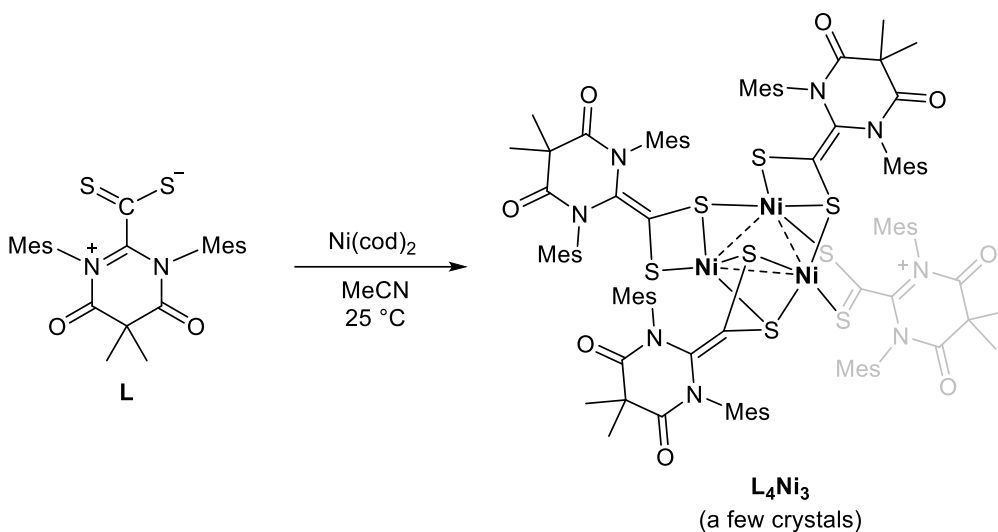

In a  $N_2$  atmosphere glove box, **L** (10.0 mg, 0.022 mmol) and  $Ni(cod)_2$  (3.04 mg, 0.011 mmol) were placed in a 4 mL vial, and subsequently dry acetonitrile (0.6 mL) was added to the vial. The reaction mixture was shaken for 1 minute and then filtered to a thin pad of Celite to remove any insoluble material. The resulting filtrate was concentrated *in vacuo* to half its volume. Recrystallization by layering dry ether over the concentrated filtrate resulted in the formation of brown block-shaped crystals of the product along with other byproducts, preventing the isolation of pure product on any preparative scale.

## NMR

### General information

All NMR spectra were recorded using a Bruker Ascend™ 400 MHz spectrometer. Chemical shifts were referenced to the residual solvent peaks.<sup>1</sup>

### NMR spectra

#### <sup>1</sup>H, <sup>13</sup>C NMR spectra of L

(A)

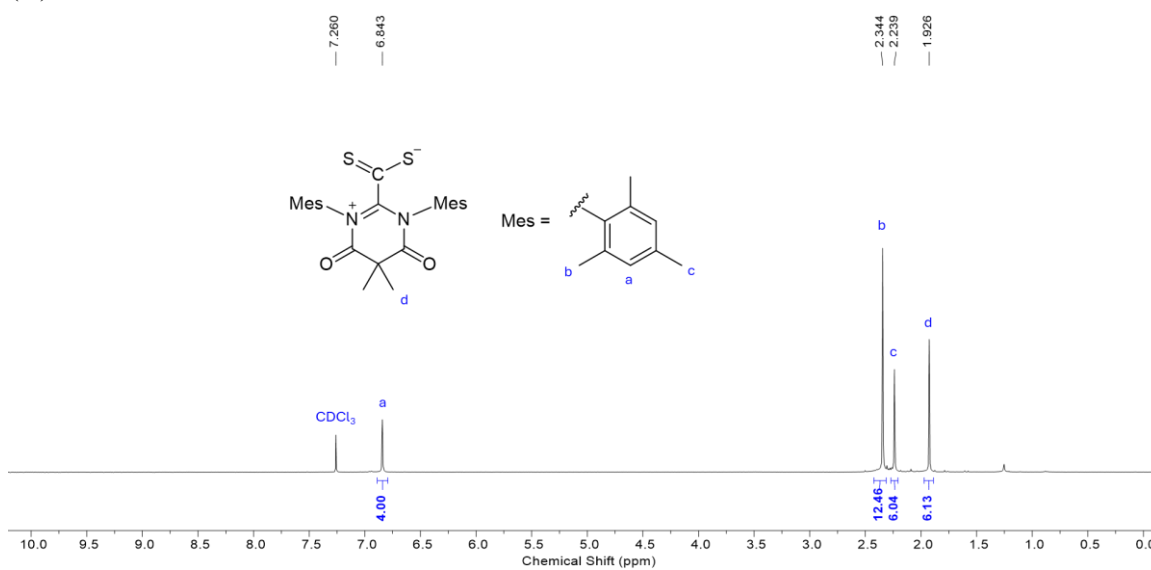

(B)

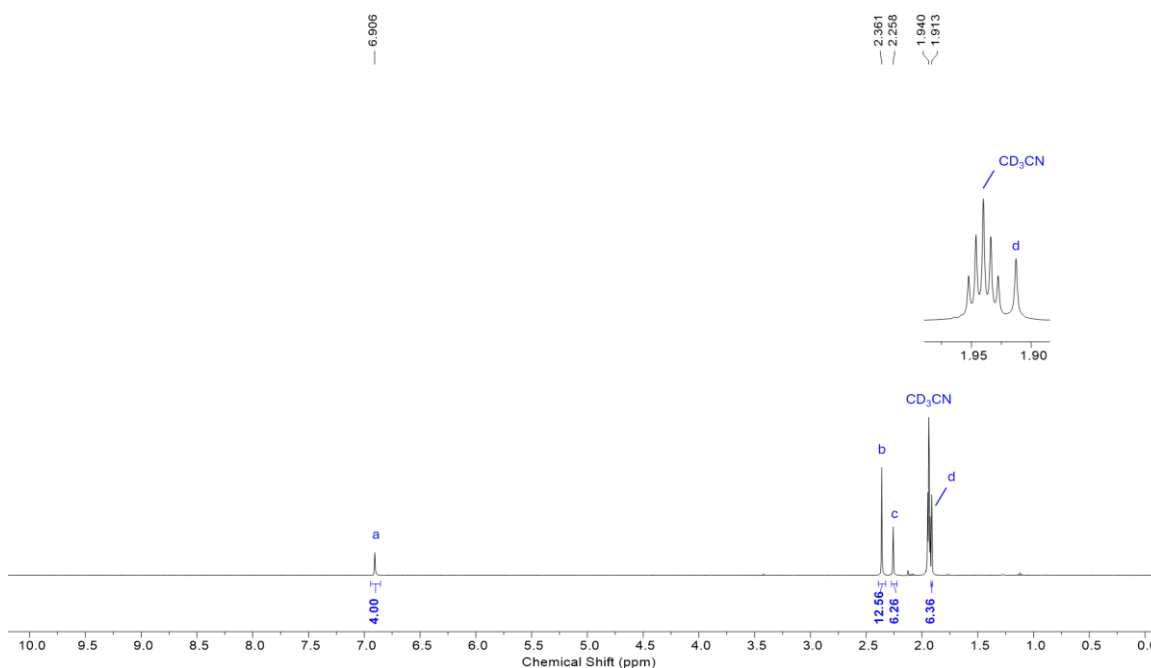

**Figure S1.** (A) <sup>1</sup>H NMR spectrum in CDCl<sub>3</sub> and (B) CD<sub>3</sub>CN, and (C) proton decoupled <sup>13</sup>C NMR spectrum and assignment of the signals for L (\* not detected).

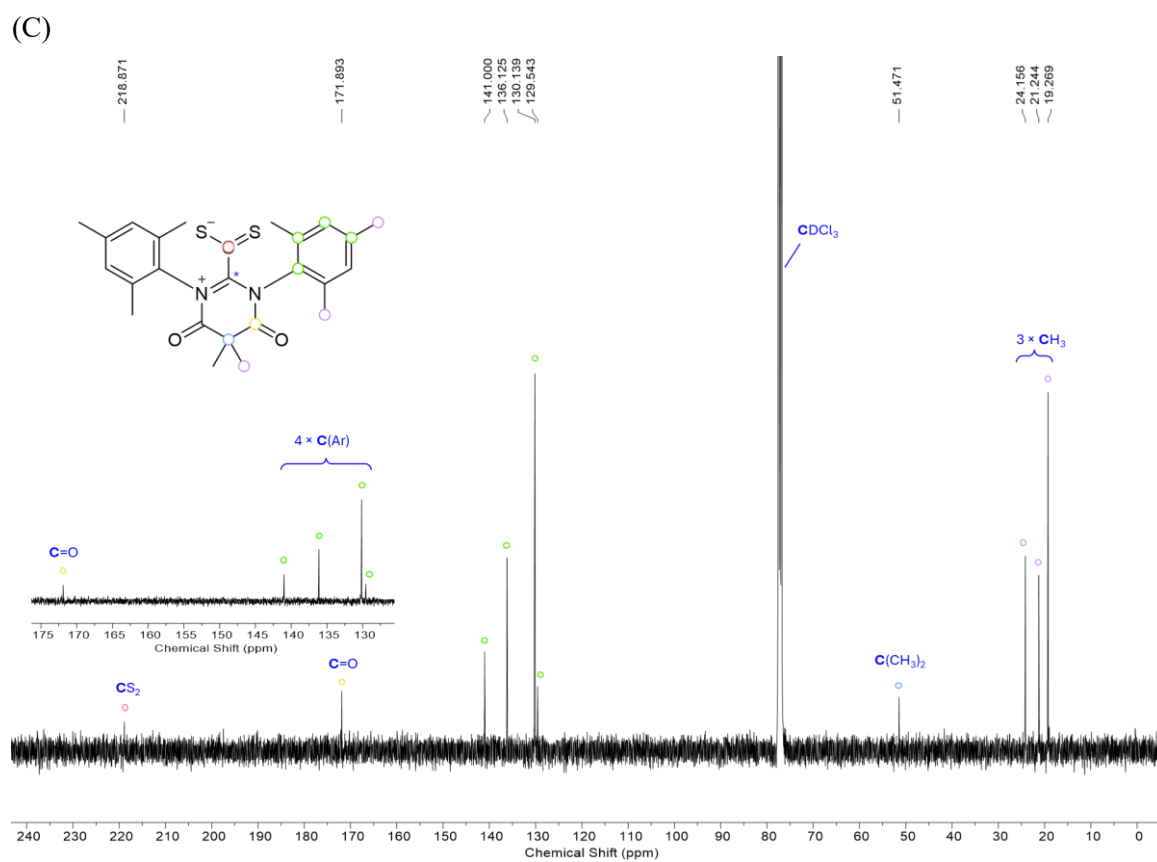

**Figure S1 (continued).** (A)  $^1\text{H}$  NMR spectrum in  $\text{CDCl}_3$  and (B)  $\text{CD}_3\text{CN}$ , and (C) proton decoupled  $^{13}\text{C}$  NMR spectrum and assignment of the signals for L (\* not detected).



$^1\text{H}$ ,  $^{13}\text{C}$  NMR spectra of  $\text{L}_4\text{Pd}_4$ 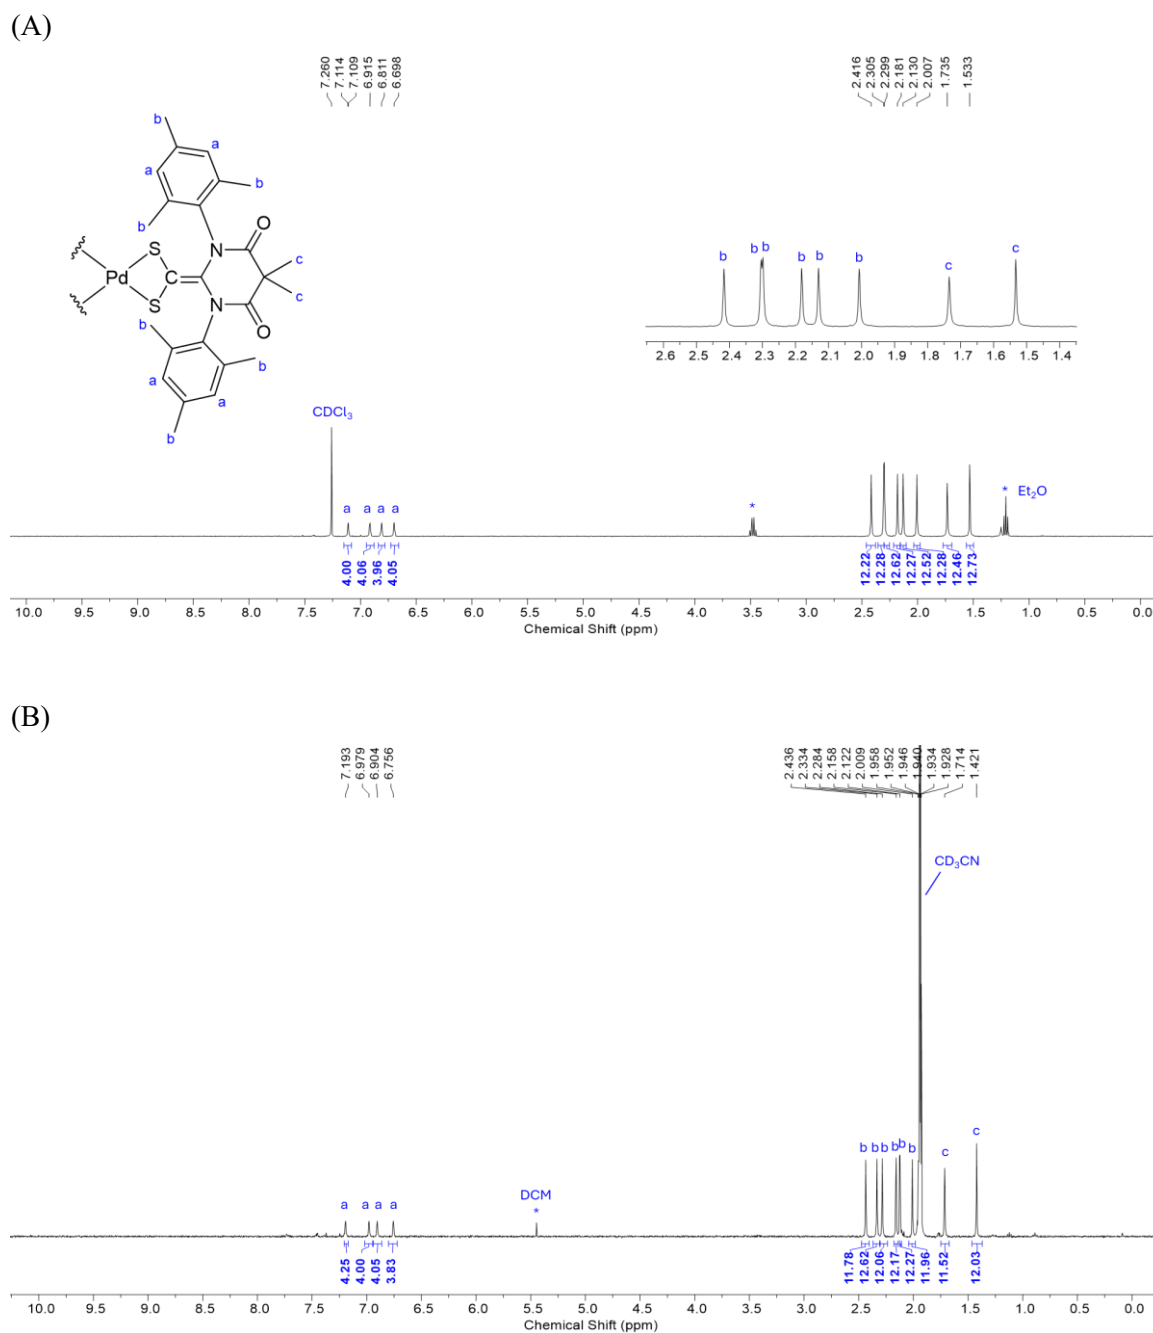

**Figure S2.** (A)  $^1\text{H}$  NMR spectrum in  $\text{CDCl}_3$ , (B)  $\text{CD}_3\text{CN}$ , (C)  $\text{C}_6\text{D}_6$ , and (D) proton decoupled  $^{13}\text{C}$  NMR spectrum and assignment of the signals for  $\text{L}_4\text{Pd}_4$ .

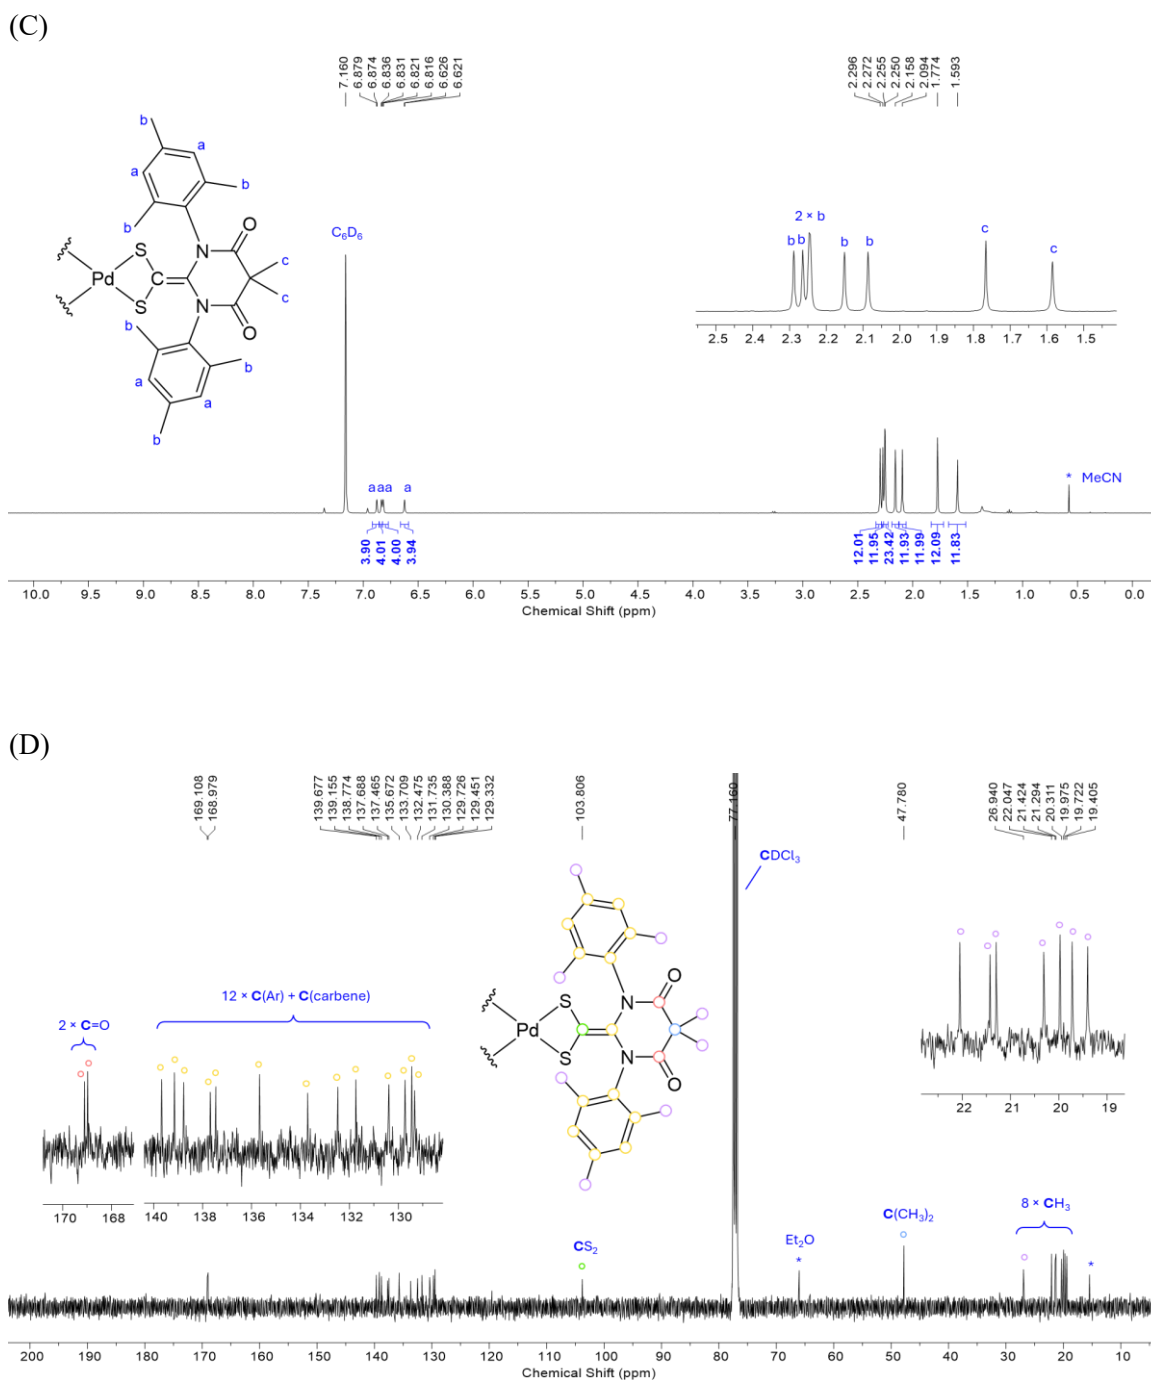

**Figure S2 (continued).** (A)  $^1H$  NMR spectrum in  $CDCl_3$ , (B)  $CD_3CN$ , (C)  $C_6D_6$ , and (D) proton decoupled  $^{13}C$  NMR spectrum and assignment of the signals for  $L_4Pd_4$ .

$^1\text{H}$ ,  $^{13}\text{C}$  NMR spectra of  $\text{L}_4\text{Ni}_4$ 

(A)

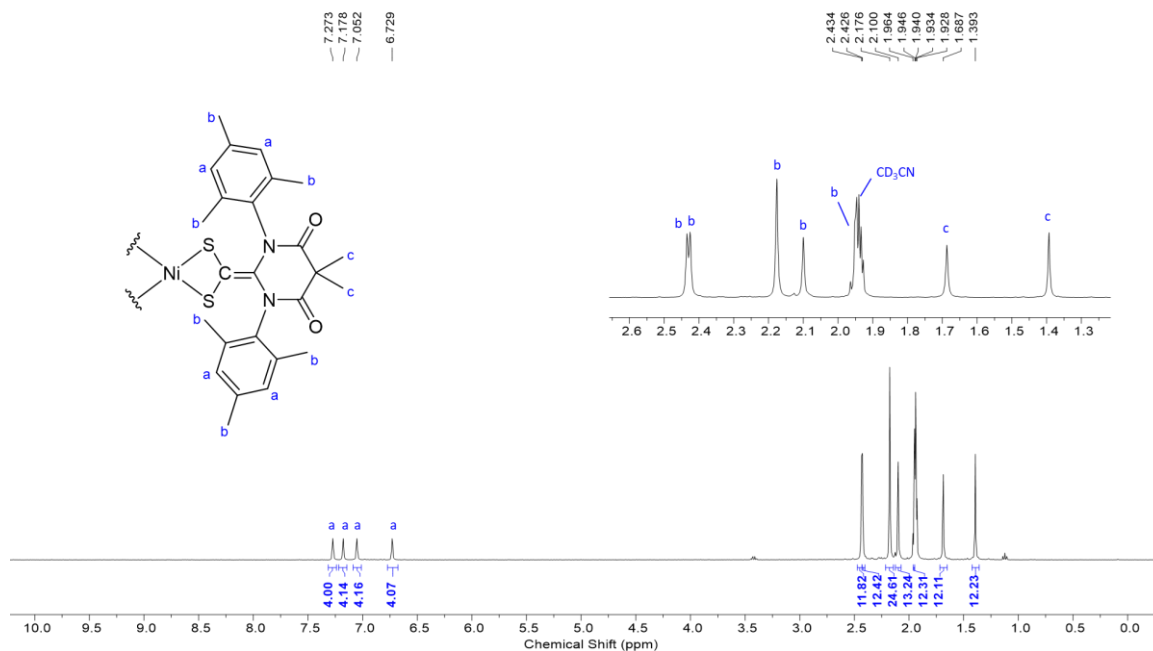

(B)

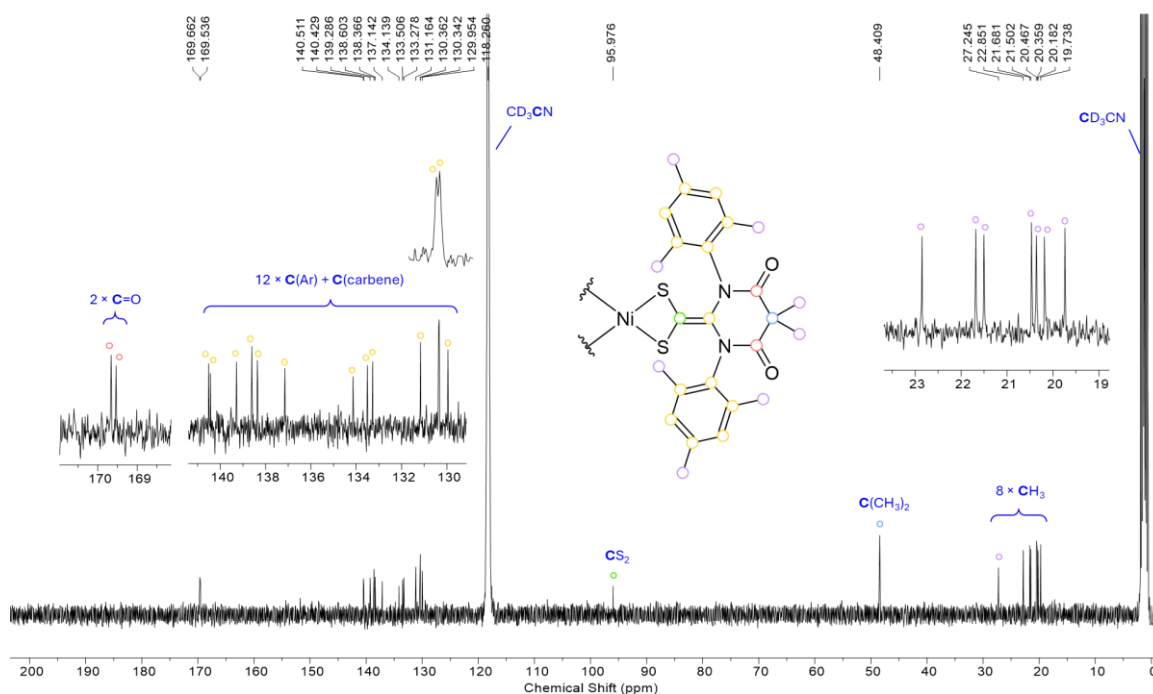

**Figure S3.** (A)  $^1\text{H}$  NMR spectrum and (B) proton decoupled  $^{13}\text{C}$  NMR spectrum and assignment of the signals for  $\text{L}_4\text{Ni}_4$ .

To confirm that the  $L_4Pd_4$  and  $L_4Ni_4$  clusters remain intact and do not dissociate into ligands in solution, we measured the NMR spectra of a mixture containing the cluster and free ligand.

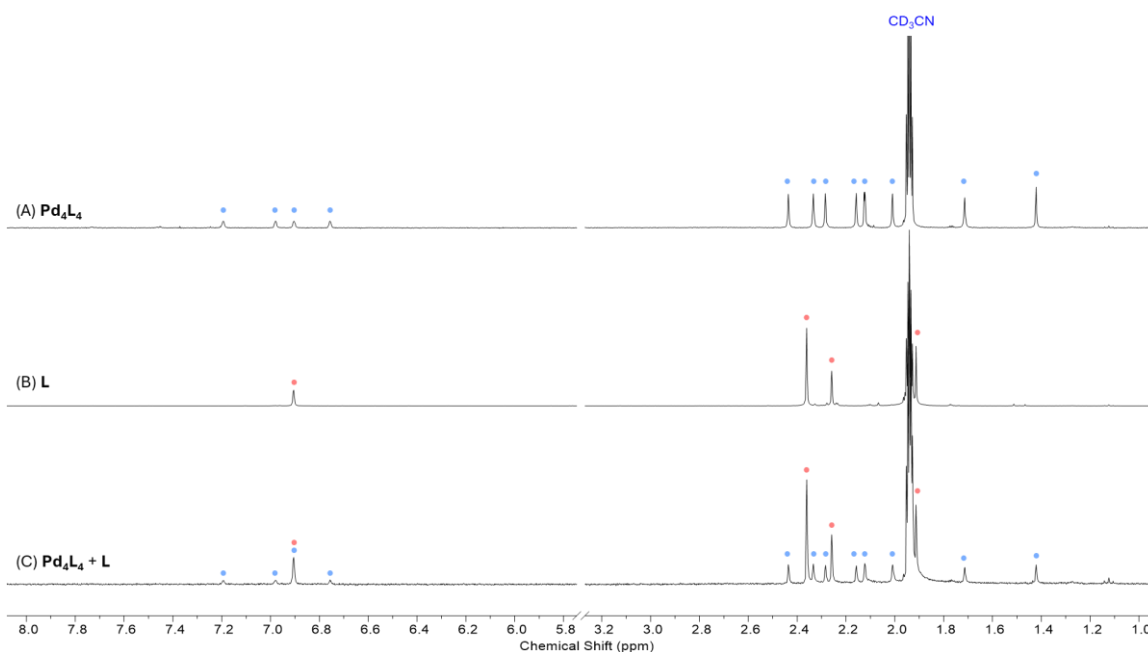

**Figure S4.**  $^1H$  NMR spectrum of (A)  $L_4Pd_4$  (blue circle), (B)  $L$  (red circle), and (C) mixture of  $L_4Pd_4$  and  $L$ .

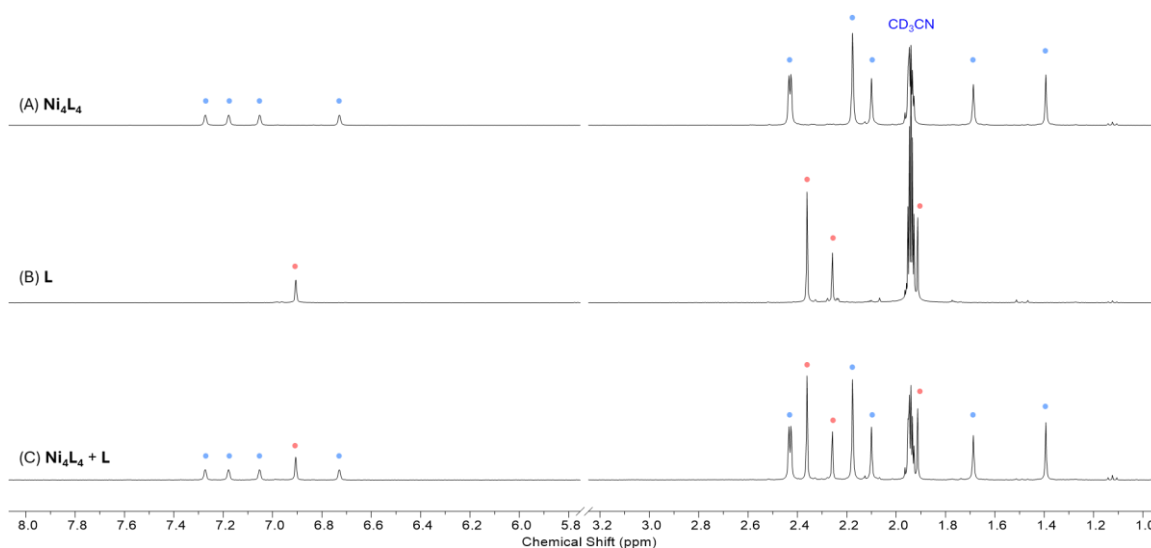

**Figure S5.**  $^1H$  NMR spectrum of (A)  $L_4Ni_4$ , (B)  $L$ , and (C) mixture of  $L_4Ni_4$  and  $L$ .

## X-ray Crystallography

CCDC 2381957–2381960 contains the supplementary crystallographic data for **L**, **L<sub>4</sub>Pd<sub>4</sub>**, **L<sub>4</sub>Ni<sub>4</sub>**, and **L<sub>4</sub>Ni<sub>3</sub>**, respectively. These data can be obtained free of charge via <https://www.ccdc.cam.ac.uk/>

### General information

A suitable crystal was coated with immersion oil and the diffraction data was measured with a Mo K $\alpha$  radiation source on a Bruker D8 Venture diffractometer. Using Olex2,<sup>3</sup> The structure was solved by ShelXT<sup>4</sup> using intrinsic phasing and refined by ShelXL<sup>5</sup> using least squares minimization. All the non-hydrogen atoms were refined anisotropically. All hydrogen atoms were added to their geometrically ideal positions.

### Crystal data and structure refinements

|                                             | <b>L</b>                                                                     | <b>L<sub>4</sub>Pd<sub>4</sub></b>                                                             | <b>L<sub>4</sub>Ni<sub>4</sub></b>                                                             | <b>L<sub>4</sub>Ni<sub>3</sub></b>                                                                         |
|---------------------------------------------|------------------------------------------------------------------------------|------------------------------------------------------------------------------------------------|------------------------------------------------------------------------------------------------|------------------------------------------------------------------------------------------------------------|
| Empirical formula                           | C <sub>25</sub> H <sub>28</sub> N <sub>2</sub> O <sub>2</sub> S <sub>2</sub> | C <sub>102</sub> H <sub>115</sub> N <sub>9</sub> O <sub>8</sub> Pd <sub>4</sub> S <sub>8</sub> | C <sub>102</sub> H <sub>115</sub> N <sub>9</sub> Ni <sub>4</sub> O <sub>8</sub> S <sub>8</sub> | C <sub>106.75</sub> H <sub>125.53</sub> N <sub>9.68</sub> Ni <sub>3</sub> O <sub>8.85</sub> S <sub>8</sub> |
| Formula weight                              | 452.61                                                                       | 2277.10                                                                                        | 2086.34                                                                                        | 2118.48                                                                                                    |
| Temperature/K                               | 100                                                                          | 150                                                                                            | 150                                                                                            | 150                                                                                                        |
| Crystal system                              | orthorhombic                                                                 | triclinic                                                                                      | triclinic                                                                                      | triclinic                                                                                                  |
| Space group                                 | Pca2 <sub>1</sub>                                                            | P-1                                                                                            | P-1                                                                                            | P-1                                                                                                        |
| a/Å                                         | 31.023(5)                                                                    | 15.1195(5)                                                                                     | 15.1288(8)                                                                                     | 14.1896(15)                                                                                                |
| b/Å                                         | 8.7121(14)                                                                   | 15.5620(5)                                                                                     | 15.5209(8)                                                                                     | 16.1897(18)                                                                                                |
| c/Å                                         | 17.796(3)                                                                    | 21.9749(7)                                                                                     | 21.5815(12)                                                                                    | 25.073(2)                                                                                                  |
| $\alpha$ /°                                 | 90                                                                           | 89.1590(10)                                                                                    | 89.171(2)                                                                                      | 89.342(4)                                                                                                  |
| $\beta$ /°                                  | 90                                                                           | 83.5970(10)                                                                                    | 84.225(2)                                                                                      | 89.718(4)                                                                                                  |
| $\gamma$ /°                                 | 90                                                                           | 76.3130(10)                                                                                    | 76.607(2)                                                                                      | 66.280(4)                                                                                                  |
| Volume/Å <sup>3</sup>                       | 4809.7(13)                                                                   | 4991.9(3)                                                                                      | 4904.6(5)                                                                                      | 5272.9(10)                                                                                                 |
| Z                                           | 8                                                                            | 2                                                                                              | 2                                                                                              | 2                                                                                                          |
| $\rho_{\text{calc}}$ /cm <sup>3</sup>       | 1.250                                                                        | 1.515                                                                                          | 1.413                                                                                          | 1.334                                                                                                      |
| $\mu$ /mm <sup>-1</sup>                     | 0.245                                                                        | 0.937                                                                                          | 0.988                                                                                          | 0.749                                                                                                      |
| F(000)                                      | 1920.0                                                                       | 2332.0                                                                                         | 2188.0                                                                                         | 2233.0                                                                                                     |
| Crystal size/mm <sup>3</sup>                | 0.1 × 0.1 × 0.1                                                              | 0.1 × 0.08 × 0.08                                                                              | 0.1 × 0.1 × 0.1                                                                                | 0.1 × 0.1 × 0.05                                                                                           |
| Radiation                                   | MoK $\alpha$ ( $\lambda$ = 0.71073)                                          | MoK $\alpha$ ( $\lambda$ = 0.71073)                                                            | MoK $\alpha$ ( $\lambda$ = 0.71073)                                                            | MoK $\alpha$ ( $\lambda$ = 0.71073)                                                                        |
| 2 $\theta$ range for data collection/°      | 4.676 to 50.054                                                              | 4.83 to 50.7                                                                                   | 4.636 to 50.7                                                                                  | 3.632 to 50.376                                                                                            |
| Index ranges                                | -36 ≤ h ≤ 35,<br>-9 ≤ k ≤ 10,<br>-21 ≤ l ≤ 21                                | -18 ≤ h ≤ 18,<br>-18 ≤ k ≤ 18,<br>-26 ≤ l ≤ 26                                                 | -18 ≤ h ≤ 18,<br>-18 ≤ k ≤ 18,<br>-25 ≤ l ≤ 25                                                 | -16 ≤ h ≤ 16,<br>-19 ≤ k ≤ 19,<br>-30 ≤ l ≤ 30                                                             |
| Reflections collected                       | 27140                                                                        | 288654                                                                                         | 299389                                                                                         | 217573                                                                                                     |
| Independent reflections                     | 8467 [R <sub>int</sub> = 0.1415,<br>R <sub>sigma</sub> = 0.1364]             | 18271 [R <sub>int</sub> = 0.0845,<br>R <sub>sigma</sub> = 0.0289]                              | 17932 [R <sub>int</sub> = 0.2189,<br>R <sub>sigma</sub> = 0.0620]                              | 18939 [R <sub>int</sub> = 0.1328,<br>R <sub>sigma</sub> = 0.0590]                                          |
| Data/restraints/parameters                  | 8467/1/575                                                                   | 18271/74/1240                                                                                  | 17932/44/1201                                                                                  | 18939/95/1278                                                                                              |
| Goodness-of-fit on F <sup>2</sup>           | 1.020                                                                        | 1.076                                                                                          | 1.011                                                                                          | 1.047                                                                                                      |
| Final R indexes [I >= 2 $\sigma$ (I)]       | R <sub>1</sub> = 0.0753,<br>wR <sub>2</sub> = 0.1641                         | R <sub>1</sub> = 0.0248,<br>wR <sub>2</sub> = 0.0547                                           | R <sub>1</sub> = 0.0333,<br>wR <sub>2</sub> = 0.0839                                           | R <sub>1</sub> = 0.0887,<br>wR <sub>2</sub> = 0.2396                                                       |
| Final R indexes [all data]                  | R <sub>1</sub> = 0.1063,<br>wR <sub>2</sub> = 0.1916                         | R <sub>1</sub> = 0.0322,<br>wR <sub>2</sub> = 0.0603                                           | R <sub>1</sub> = 0.0517,<br>wR <sub>2</sub> = 0.0916                                           | R <sub>1</sub> = 0.1185,<br>wR <sub>2</sub> = 0.2797                                                       |
| Largest diff. peak/hole / e Å <sup>-3</sup> | 0.60/-0.35                                                                   | 0.57/-0.47                                                                                     | 1.77/-1.20                                                                                     | 1.45/-1.65                                                                                                 |
| Flack parameter                             | 0.00(11)                                                                     | -                                                                                              | -                                                                                              | -                                                                                                          |

## Structural data

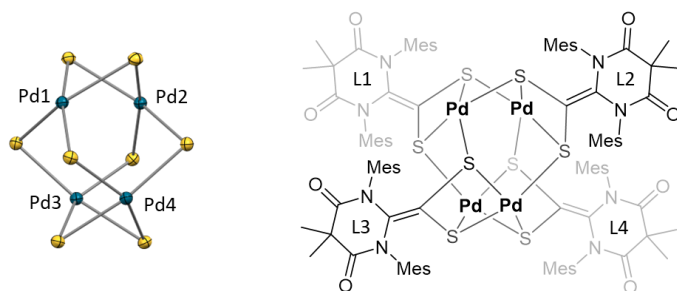

| Pd–Pd (Å)   |            | $\Sigma(\angle S-Pd-S)$ (°) <sup>a</sup> | $C_{DAC}-C_{Cs}$ (Å) | NCCS torsion angle (°) |           |    |          |    |         |
|-------------|------------|------------------------------------------|----------------------|------------------------|-----------|----|----------|----|---------|
| Short Pd–Pd | Long Pd–Pd |                                          |                      |                        |           |    |          |    |         |
| Pd(1)–Pd(2) | 2.6522(6)  | Pd(1)–Pd(3)                              | 3.2977(5)            | Pd(1)                  | 354.61(5) | L1 | 1.361(4) | L1 | 10.7(4) |
| Pd(3)–Pd(4) | 2.6526(5)  | Pd(1)–Pd(4)                              | 3.2845(4)            | Pd(2)                  | 354.27(5) | L2 | 1.359(4) | L2 | 10.1(4) |
|             |            | Pd(2)–Pd(3)                              | 3.2899(5)            | Pd(3)                  | 354.33(5) | L3 | 1.361(3) | L3 | 10.1(4) |
|             |            | Pd(2)–Pd(4)                              | 3.3064(4)            | Pd(4)                  | 354.23(5) | L4 | 1.361(3) | L4 | 9.3(4)  |

**Table S1.** Selected bond lengths (Å) and angles (°) for **L<sub>4</sub>Pd<sub>4</sub>**. *a*. Uncertainties for the sum of angles are given as the root sum of the squares of the individual estimated standard deviations.

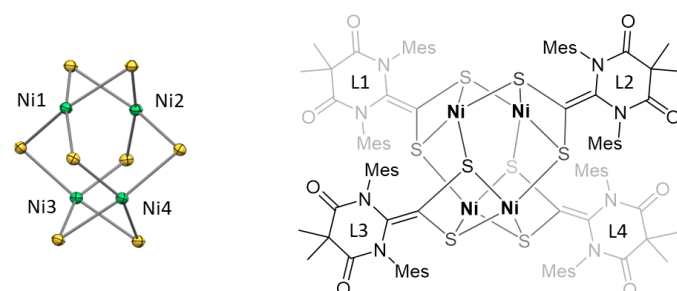

| Ni–Ni (Å)   |            | $\Sigma(\angle S-Ni-S)$ (°) <sup>a</sup> | $C_{DAC}-C_{Cs}$ (Å) | NCCS torsion angle (°) |           |    |          |    |        |
|-------------|------------|------------------------------------------|----------------------|------------------------|-----------|----|----------|----|--------|
| Short Ni–Ni | Long Ni–Ni |                                          |                      |                        |           |    |          |    |        |
| Ni(1)–Ni(2) | 2.4214(6)  | Ni(1)–Ni(3)                              | 3.0907(4)            | Ni(1)                  | 355.63(6) | L1 | 1.357(4) | L1 | 8.0(4) |
| Ni(3)–Ni(4) | 2.4156(5)  | Ni(1)–Ni(4)                              | 3.0925(5)            | Ni(2)                  | 355.67(6) | L2 | 1.357(4) | L2 | 8.4(4) |
|             |            | Ni(2)–Ni(3)                              | 3.0836(4)            | Ni(3)                  | 355.60(6) | L3 | 1.358(4) | L3 | 8.4(4) |
|             |            | Ni(2)–Ni(4)                              | 3.1027(5)            | Ni(4)                  | 355.93(6) | L4 | 1.359(4) | L4 | 8.2(4) |

**Table S2.** Selected bond lengths (Å) and angles (°) for **L<sub>4</sub>Ni<sub>4</sub>**. *a*. Uncertainties for the sum of angles are given as the root sum of the squares of the individual estimated standard deviations.

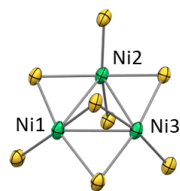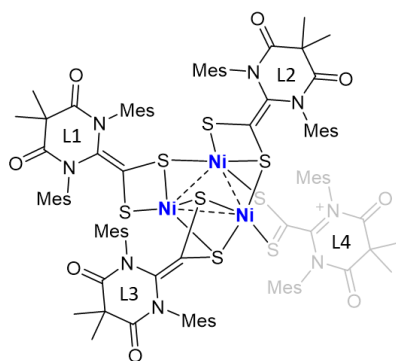

| Ni–Ni (Å)   |           | $\Sigma(\angle \text{S–Ni–S})$ (°) <sup>a</sup> |            | $C_{\text{DAC}}\text{--}C_{\text{CS}}$ (Å) |           | NCCS torsion angle (°) |         |
|-------------|-----------|-------------------------------------------------|------------|--------------------------------------------|-----------|------------------------|---------|
| Ni(1)–Ni(2) | 2.764(2)  | Ni(1)                                           | 361.51(19) | L1                                         | 1.338(13) | L1                     | 9.4(7)  |
| Ni(2)–Ni(3) | 2.712(15) | Ni(2)                                           | 368.14(18) | L2                                         | 1.343(13) | L2                     | 8.4(7)  |
| Ni(1)–Ni(3) | 2.579(2)  | Ni(3)                                           | 359.12(16) | L3                                         | 1.358(13) | L3                     | 7.8(8)  |
|             |           |                                                 |            | L4                                         | 1.523(12) | L4                     | 76.5(9) |

**Table S3.** Selected bond lengths (Å) and angles (°) for  $L_4\text{Ni}_3$ . *a*. Uncertainties for the sum of angles are given as the root sum of the squares of the individual estimated standard deviations.

## UV-Vis Spectroscopy

### General information

The UV-vis spectra were recorded at room temperature with a V-770 Double Beam UV-Visible-NIR Spectrophotometer(Jasco, Inc.) with quartz UV cell.

### UV-Vis spectra

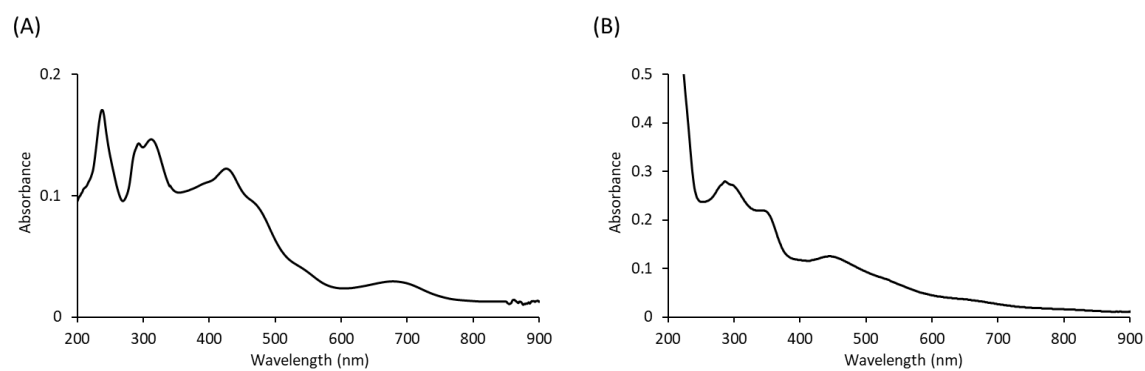

**Figure S6.** (A) UV-vis absorption of  $L_4Pd_4$  (0.025 mM in THF) and (B)  $L_4Ni_4$  (0.054 mM in MeCN). Path length = 10 mm.



## DFT Calculation

### General information

Geometry optimizations were performed using Gaussian 16-A03 package<sup>6</sup> with TPSSh functional<sup>7</sup> and Def2-TZVP<sup>8</sup> basis set. In the geometry optimization, the default tight convergence in the SCF cycle was used without any orbital symmetry constraints. Input coordinates were taken from the solid-state structures obtained from X-ray crystallography. To improve the efficiency of the calculations, the DAC mesityl groups were replaced with methyl groups. Wiberg bond indices (WBIs) were calculated from the optimized geometry with the natural atomic orbital (NAO) basis set.<sup>9</sup>

### DFT-optimized structural parameters

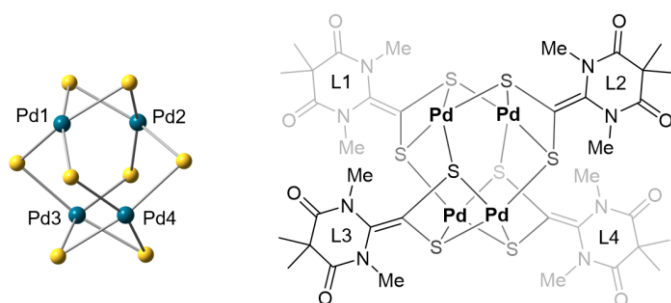

|             | Pd–Pd (Å)       |             | $\Sigma(\angle S-Pd-S)$ (°) <sup>a</sup> | $C_{DAC}-C_{Cs}$ (Å) | NCCS torsion angle (°) |    |                 |    |     |
|-------------|-----------------|-------------|------------------------------------------|----------------------|------------------------|----|-----------------|----|-----|
|             | Short Pd–Pd     | Long Pd–Pd  |                                          |                      |                        |    |                 |    |     |
| Pd(1)–Pd(2) | 2.665<br>(0.18) | Pd(1)–Pd(3) | 3.311<br>(0.08)                          | Pd(1)                | 354.0                  | L1 | 1.361<br>(1.58) | L1 | 2.4 |
| Pd(3)–Pd(4) | 2.665<br>(0.18) | Pd(1)–Pd(4) | 3.310<br>(0.08)                          | Pd(2)                | 354.0                  | L2 | 1.361<br>(1.58) | L2 | 2.4 |
|             |                 | Pd(2)–Pd(3) | 3.311<br>(0.08)                          | Pd(3)                | 354.0                  | L3 | 1.361<br>(1.58) | L3 | 2.4 |
|             |                 | Pd(2)–Pd(4) | 3.310<br>(0.08)                          | Pd(4)                | 354.1                  | L4 | 1.361<br>(1.58) | L4 | 2.4 |

**Table S4.** Selected bond lengths (Å) and angles (°) for **L<sub>4</sub>Pd<sub>4</sub>** from DFT calculation. Wiberg bond indices are shown in parentheses.

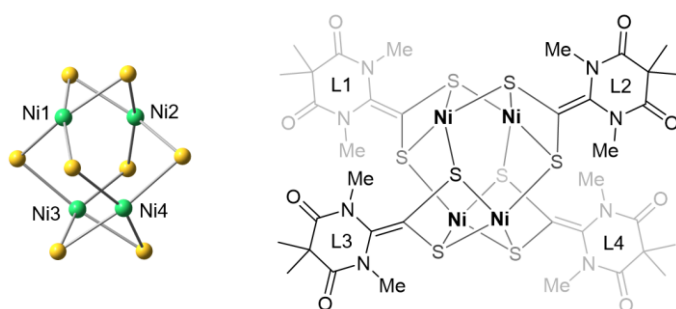

| Ni–Ni (Å)   |                 | $\Sigma(\angle S-Ni-S) (^{\circ})^a$ |                 | $C_{DAC}-C_{CS}$ (Å) | NCCS torsion angle ( $^{\circ}$ ) |    |                 |    |     |
|-------------|-----------------|--------------------------------------|-----------------|----------------------|-----------------------------------|----|-----------------|----|-----|
| Short Ni–Ni |                 | Long Ni–Ni                           |                 |                      |                                   |    |                 |    |     |
| Ni(1)–Ni(2) | 2.402<br>(0.16) | Ni(1)–Ni(3)                          | 3.077<br>(0.06) | Ni(1)                | 355.8                             | L1 | 1.359<br>(1.60) | L1 | 3.5 |
| Ni(3)–Ni(4) | 2.402<br>(0.16) | Ni(1)–Ni(4)                          | 3.077<br>(0.06) | Ni(2)                | 355.8                             | L2 | 1.359<br>(1.60) | L2 | 3.5 |
|             |                 | Ni(2)–Ni(3)                          | 3.077<br>(0.06) | Ni(3)                | 355.8                             | L3 | 1.359<br>(1.60) | L3 | 3.4 |
|             |                 | Ni(2)–Ni(4)                          | 3.077<br>(0.06) | Ni(4)                | 355.8                             | L4 | 1.359<br>(1.60) | L4 | 3.6 |

**Table S5.** Selected bond lengths (Å) and angles ( $^{\circ}$ ) for  $L_4Ni_4$  from DFT calculation. Wiberg bond indices are shown in parentheses.

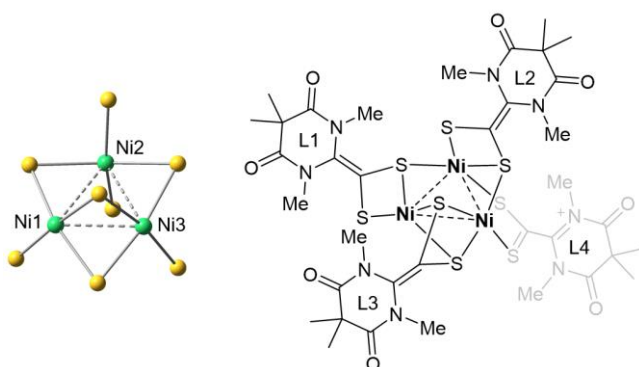

| Ni–Ni (Å)   |                 | $\Sigma(\angle S-Ni-S) (^{\circ})$ |       | $C_{DAC}-C_{CS}$ (Å) | NCCS torsion angle ( $^{\circ}$ ) |                 |      |
|-------------|-----------------|------------------------------------|-------|----------------------|-----------------------------------|-----------------|------|
| Ni(1)–Ni(2) | 2.712<br>(0.11) | Ni(1)                              | 359.9 |                      | L1                                | 1.354<br>(1.60) | L1   |
| Ni(2)–Ni(3) | 2.658<br>(0.11) | Ni(2)                              | 367.2 | L2                   | 1.356<br>(1.59)                   | L2              | 0.6  |
| Ni(1)–Ni(3) | 2.557<br>(0.13) | Ni(3)                              | 359.2 | L3                   | 1.346<br>(1.64)                   | L3              | 0.1  |
|             |                 |                                    |       | L4                   | 1.480<br>(1.00)                   | L4              | 82.4 |

**Table S6.** Selected bond lengths (Å) and angles ( $^{\circ}$ ) for  $L_4Ni_3$  from DFT calculation. Wiberg bond indices are shown in parentheses.

### Coordinates of optimized structures

The following optimized geometries were displayed in Cartesian coordinates (atomic unit).  $E^\circ$  represents the electronic energy of the optimized structure in Hartree unit.

**L<sub>4</sub>Pd<sub>4</sub>** [ $E^\circ = -5824.6602745$ ]

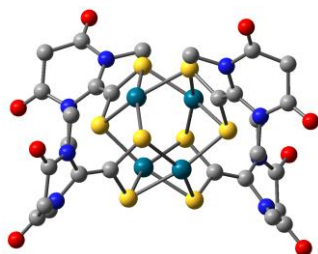

Charge = 0; Multiplicity = 1;

| Atomic coordinates (Cartesian; in atomic unit) |           |           |           |   |           |           |           |
|------------------------------------------------|-----------|-----------|-----------|---|-----------|-----------|-----------|
| Pd                                             | -0.918841 | 7.803218  | 17.857996 | C | 6.014714  | 8.208948  | 19.900795 |
| Pd                                             | 1.454426  | 8.409771  | 16.80807  | H | 5.713214  | 8.267441  | 20.946947 |
| Pd                                             | 1.622362  | 7.264647  | 19.90995  | H | 5.337675  | 7.555394  | 19.354248 |
| Pd                                             | 0.896892  | 9.824036  | 19.748974 | H | 7.033855  | 7.826986  | 19.85245  |
| S                                              | -0.569573 | 6.346087  | 19.684553 | C | 4.73956   | 10.389671 | 15.960405 |
| S                                              | 2.681073  | 6.666741  | 17.883887 | H | 4.239749  | 9.42304   | 15.986037 |
| S                                              | -1.305313 | 9.916982  | 18.897872 | H | 4.021925  | 11.171514 | 15.709657 |
| S                                              | -0.639616 | 9.410946  | 16.163846 | H | 5.53118   | 10.388975 | 15.21198  |
| S                                              | 0.304945  | 6.418031  | 16.313324 | C | -0.046357 | 12.158313 | 14.844441 |
| S                                              | 3.079383  | 9.14242   | 20.3018   | H | 0.774374  | 11.869886 | 15.498202 |
| S                                              | 2.247485  | 10.37195  | 17.858437 | H | -0.246229 | 11.364311 | 14.124456 |
| S                                              | 0.309721  | 8.330253  | 21.545414 | H | 0.202892  | 13.068328 | 14.299785 |
| O                                              | 4.264304  | 1.757294  | 17.557498 | C | -1.3254   | 13.027964 | 19.262891 |
| O                                              | -3.262737 | 14.663567 | 18.278192 | H | -1.95169  | 12.521467 | 19.998013 |
| O                                              | -2.03296  | 13.836232 | 14.046266 | H | -0.320998 | 12.608758 | 19.280834 |
| N                                              | 2.786059  | 3.480781  | 17.710362 | H | -1.298387 | 14.090915 | 19.499979 |
| O                                              | 0.440568  | 1.432377  | 15.238544 | C | -3.667036 | 6.065381  | 20.058056 |
| N                                              | 0.764376  | 3.314266  | 16.477791 | H | -3.394024 | 6.930762  | 19.456863 |
| N                                              | -3.234034 | 6.288981  | 21.442595 | H | -3.217706 | 5.165208  | 19.637424 |
| N                                              | -1.872894 | 12.900058 | 17.907069 | H | -4.749102 | 5.940315  | 20.075582 |
| N                                              | -1.226809 | 12.455673 | 15.666682 | C | -0.68756  | 3.490325  | 16.614601 |
| N                                              | 6.0178    | 9.531518  | 19.26151  | H | -0.889984 | 4.049853  | 17.525745 |
| N                                              | 5.373422  | 10.635138 | 17.261307 | H | -1.113442 | 4.009635  | 15.7557   |
| O                                              | 6.886457  | 12.027578 | 16.285931 | H | -1.127204 | 2.495283  | 16.673638 |
| O                                              | -3.458933 | 8.097808  | 24.976266 | C | -2.221756 | 9.44174   | 22.960516 |
| O                                              | -4.835547 | 4.859119  | 22.197581 | H | -1.294367 | 9.657109  | 23.491862 |
| C                                              | 1.692025  | 4.14991   | 17.129185 | H | -2.164349 | 9.821865  | 21.942465 |
| C                                              | 3.346296  | 2.388608  | 17.072577 | H | -3.047091 | 9.910209  | 23.495515 |
| C                                              | -2.226543 | 7.213426  | 21.778574 | N | -2.499065 | 7.99996   | 22.914467 |
| C                                              | -1.083501 | 10.678513 | 17.312113 | C | -3.461413 | 5.971258  | 23.838671 |
| C                                              | -1.377801 | 11.965083 | 16.978087 | H | -4.21681  | 5.673594  | 24.560309 |
| O                                              | 8.11254   | 9.933878  | 20.056543 | H | -2.542982 | 5.406085  | 24.041395 |
| C                                              | -2.150497 | 13.348952 | 15.152864 | C | 3.300671  | 3.822613  | 19.041825 |
| C                                              | 4.966294  | 9.974777  | 18.436267 | H | 4.194046  | 4.444763  | 18.979137 |
| C                                              | 1.547283  | 5.502824  | 17.174279 | H | 2.524639  | 4.34459   | 19.598748 |
| C                                              | -1.06755  | 7.32895   | 21.07366  | H | 3.560299  | 2.887349  | 19.536514 |
| C                                              | 1.207143  | 2.208224  | 15.773542 | C | 2.712792  | 2.068943  | 15.736873 |
| C                                              | -2.837211 | 13.813755 | 17.521101 | H | 2.979228  | 1.059076  | 15.438263 |
| C                                              | 3.657484  | 9.792275  | 18.763627 | H | 3.107114  | 2.769419  | 14.989958 |
| C                                              | 6.476148  | 11.470104 | 17.284586 | C | -3.298965 | 13.648337 | 16.090393 |
| C                                              | -3.931396 | 5.6334    | 22.441363 | H | -3.810966 | 14.549446 | 15.765052 |
| C                                              | 7.160986  | 10.299799 | 19.395904 | H | -4.006567 | 12.810676 | 16.049575 |
| C                                              | -3.159378 | 7.444811  | 23.996641 | C | 7.104339  | 11.615956 | 18.652676 |
|                                                |           |           |           | H | 8.10658   | 12.022887 | 18.553174 |
|                                                |           |           |           | H | 6.498766  | 12.318688 | 19.238758 |

**L<sub>4</sub>Ni<sub>4</sub>** [ $E^\circ = -11346.6447823$ ]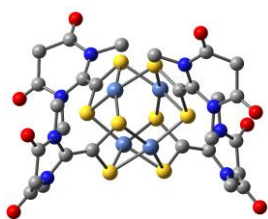

Charge = 0; Multiplicity = 1;

| Atomic coordinates (Cartesian; in atomic unit) |           |           |           |
|------------------------------------------------|-----------|-----------|-----------|
| Ni                                             | -0.77715  | 7.85626   | 17.876276 |
| Ni                                             | 1.367929  | 8.38083   | 16.93121  |
| Ni                                             | 1.547391  | 7.375348  | 19.834086 |
| Ni                                             | 0.913889  | 9.687152  | 19.680201 |
| S                                              | -0.480723 | 6.456541  | 19.56715  |
| S                                              | 2.580499  | 6.800659  | 17.960888 |
| S                                              | -1.164695 | 9.800675  | 18.923205 |
| S                                              | -0.554766 | 9.325128  | 16.229744 |
| S                                              | 0.275911  | 6.528178  | 16.390151 |
| S                                              | 2.961004  | 9.07494   | 20.273864 |
| S                                              | 2.115798  | 10.242334 | 17.87068  |
| S                                              | 0.37037   | 8.371398  | 21.427682 |
| O                                              | 4.26234   | 1.885769  | 17.717772 |
| O                                              | -3.139608 | 14.588597 | 18.422654 |
| O                                              | -2.038378 | 13.793876 | 14.140321 |
| N                                              | 2.758041  | 3.591632  | 17.81172  |
| O                                              | 0.504766  | 1.498979  | 15.28581  |
| N                                              | 0.772741  | 3.390056  | 16.525069 |
| N                                              | -3.185888 | 6.335968  | 21.306325 |
| N                                              | -1.771401 | 12.821486 | 17.989842 |
| N                                              | -1.191139 | 12.397939 | 15.726779 |
| N                                              | 5.932905  | 9.512235  | 19.233983 |
| N                                              | 5.250998  | 10.557411 | 17.214018 |
| O                                              | 6.733668  | 11.942629 | 16.182043 |
| O                                              | -3.430313 | 8.043923  | 24.892416 |
| O                                              | -4.805623 | 4.894284  | 21.999103 |
| C                                              | 1.66985   | 4.241839  | 17.198038 |
| C                                              | 3.348058  | 2.498875  | 17.202971 |
| C                                              | -2.17826  | 7.247162  | 21.677646 |
| C                                              | -0.992756 | 10.611344 | 17.355406 |
| C                                              | -1.3042   | 11.895173 | 17.037399 |
| O                                              | 8.028894  | 9.962135  | 20.000694 |
| C                                              | -2.12248  | 13.302519 | 15.24835  |
| C                                              | 4.866488  | 9.918218  | 18.408655 |
| C                                              | 1.501394  | 5.589358  | 17.244762 |
| C                                              | -1.022119 | 7.385665  | 20.977248 |
| C                                              | 1.246714  | 2.28303   | 15.843493 |
| C                                              | -2.738343 | 13.747512 | 17.642668 |
| C                                              | 3.565699  | 9.714431  | 18.744483 |
| C                                              | 6.345258  | 11.403264 | 17.199413 |
| C                                              | -3.901897 | 5.658024  | 22.276218 |
| C                                              | 7.068946  | 10.295642 | 19.334726 |
| C                                              | -3.132636 | 7.419442  | 23.893588 |
| C                                              | 5.939762  | 8.218219  | 19.928108 |
| H                                              | 5.616804  | 8.314647  | 20.965127 |
| H                                              | 5.283989  | 7.531159  | 19.39648  |
| H                                              | 6.966171  | 7.85392   | 19.914689 |
| C                                              | 4.593513  | 10.277473 | 15.932619 |
| H                                              | 4.139338  | 9.289148  | 15.976678 |
| H                                              | 3.834103  | 11.024223 | 15.697983 |
| H                                              | 5.364298  | 10.309223 | 15.163718 |
| C                                              | -0.049616 | 12.080019 | 14.859455 |
| H                                              | 0.798523  | 11.80284  | 15.482791 |
| H                                              | -0.282519 | 11.271413 | 14.165958 |
| H                                              | 0.175564  | 12.97797  | 14.28551  |
| C                                              | -1.190049 | 12.919619 | 19.333342 |
| H                                              | -1.779132 | 12.369644 | 20.068129 |
| H                                              | -0.173589 | 12.530758 | 19.30802  |
| H                                              | -1.188419 | 13.974332 | 19.605201 |
| C                                              | -3.592743 | 6.150009  | 19.908985 |
| H                                              | -3.343173 | 7.047552  | 19.345783 |
| H                                              | -3.106279 | 5.283438  | 19.459795 |
| H                                              | -4.669513 | 5.986011  | 19.908155 |
| C                                              | -0.683088 | 3.567653  | 16.597597 |
| H                                              | -0.925898 | 4.109469  | 17.509855 |
| H                                              | -1.067774 | 4.105863  | 15.730789 |
| H                                              | -1.125734 | 2.572593  | 16.615223 |
| C                                              | -2.1453   | 9.431327  | 22.934478 |
| H                                              | -1.20399  | 9.604777  | 23.456841 |
| H                                              | -2.096801 | 9.850508  | 21.931191 |
| H                                              | -2.950545 | 9.894426  | 23.50328  |
| N                                              | -2.456123 | 7.999622  | 22.835152 |
| C                                              | -3.452683 | 5.955612  | 23.689006 |
| H                                              | -4.224632 | 5.649635  | 24.389447 |
| H                                              | -2.546206 | 5.372176  | 23.893995 |
| C                                              | 3.23528   | 3.96241   | 19.148692 |
| H                                              | 4.094607  | 4.632019  | 19.098221 |
| H                                              | 2.423901  | 4.442243  | 19.693142 |
| H                                              | 3.537723  | 3.042492  | 19.647314 |
| C                                              | 2.753402  | 2.152926  | 15.856465 |
| H                                              | 3.034438  | 1.13987   | 15.582825 |
| H                                              | 3.165761  | 2.842101  | 15.108718 |
| C                                              | -3.238249 | 13.607616 | 16.222514 |
| H                                              | -3.74511  | 14.520414 | 15.922458 |
| H                                              | -3.960415 | 12.782065 | 16.189771 |
| C                                              | 6.994735  | 11.587739 | 18.552326 |
| H                                              | 7.993772  | 11.994999 | 18.425048 |
| H                                              | 6.397227  | 12.305964 | 19.127883 |

**L<sub>4</sub>Ni<sub>3</sub>** [ $E^\circ = -9838.1542605$ ]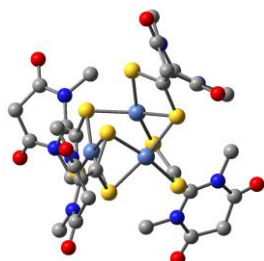

Charge = 0; Multiplicity = 1;

| Atomic coordinates (Cartesian; in atomic unit) |           |           |           |   |           |           |           |
|------------------------------------------------|-----------|-----------|-----------|---|-----------|-----------|-----------|
| Ni                                             | 9.04814   | 5.817437  | 20.351239 | C | 11.550335 | 9.523413  | 21.814563 |
| Ni                                             | 9.253664  | 6.858112  | 17.913848 | H | 11.649234 | 8.459575  | 22.038642 |
| Ni                                             | 7.219824  | 5.22779   | 18.663393 | H | 12.006623 | 9.736811  | 20.849071 |
| S                                              | 7.38941   | 6.371802  | 16.789822 | H | 12.039318 | 10.092056 | 22.604736 |
| S                                              | 7.080226  | 6.808628  | 20.296785 | C | 8.164711  | 10.894332 | 22.800367 |
| S                                              | 10.832588 | 4.501278  | 20.289121 | H | 7.886968  | 11.498058 | 23.659511 |
| S                                              | 7.376199  | 3.617885  | 17.210046 | H | 7.506189  | 10.017612 | 22.760209 |
| S                                              | 10.363194 | 7.517019  | 19.71366  | C | 8.51638   | 11.878841 | 19.159559 |
| S                                              | 10.536545 | 5.185605  | 17.312774 | H | 9.401946  | 11.660648 | 18.566009 |
| S                                              | 8.544429  | 8.904477  | 18.137403 | H | 7.622776  | 11.598163 | 18.600736 |
| S                                              | 7.560166  | 4.168417  | 20.630118 | H | 8.463923  | 12.941541 | 19.393957 |
| O                                              | 15.652243 | 3.567369  | 17.377982 | C | 5.975538  | 4.435861  | 12.414201 |
| O                                              | 7.313713  | 12.719577 | 21.468806 | H | 5.629109  | 4.318029  | 11.391654 |
| O                                              | 6.861866  | 6.555223  | 11.669806 | H | 5.105262  | 4.547185  | 13.073092 |
| O                                              | 6.705958  | 2.139243  | 12.241006 | C | 8.296277  | 2.273828  | 14.475883 |
| N                                              | 10.149139 | 9.946959  | 21.784087 | H | 9.205965  | 2.670305  | 14.925592 |
| N                                              | 7.563126  | 5.749875  | 13.683908 | H | 7.755864  | 1.677019  | 15.212717 |
| O                                              | 3.65684   | 7.568044  | 24.251282 | H | 8.532439  | 1.646042  | 13.617375 |
| N                                              | 11.95573  | 2.154873  | 18.169375 | C | 8.481243  | 6.881049  | 13.850621 |
| O                                              | 10.20284  | 10.434648 | 24.009669 | H | 7.99716   | 7.726427  | 14.341306 |
| N                                              | 13.520138 | 3.925021  | 18.103552 | H | 9.335904  | 6.557627  | 14.442438 |
| N                                              | 5.136813  | 4.157575  | 22.822376 | H | 8.799164  | 7.190237  | 12.855276 |
| O                                              | 4.453712  | 3.194726  | 24.772257 | C | 4.903496  | 5.56784   | 24.775163 |
| O                                              | 12.587362 | 0.017397  | 17.661251 | H | 4.368884  | 5.583966  | 25.720541 |
| N                                              | 8.606428  | 11.155347 | 20.433196 | H | 5.962124  | 5.783537  | 24.967395 |
| C                                              | 7.496229  | 4.821957  | 15.937091 | C | 4.191857  | 7.435291  | 21.554786 |
| N                                              | 4.716468  | 6.489953  | 22.544043 | H | 4.875407  | 8.268982  | 21.384835 |
| N                                              | 7.48795   | 3.388557  | 13.982014 | H | 4.018957  | 6.909705  | 20.616367 |
| C                                              | 9.430938  | 9.021866  | 19.644787 | H | 3.255941  | 7.827775  | 21.949915 |
| C                                              | 6.822092  | 5.688009  | 12.524053 | C | 5.012883  | 2.89048   | 22.09848  |
| C                                              | 14.600374 | 3.089153  | 17.712561 | H | 4.736403  | 3.09636   | 21.06521  |
| C                                              | 11.192653 | 4.415855  | 18.642332 | H | 5.94163   | 2.317378  | 22.121554 |
| C                                              | 9.591185  | 10.41253  | 22.956722 | H | 4.234111  | 2.311216  | 22.592895 |
| C                                              | 9.401486  | 9.997971  | 20.585138 | C | 13.815533 | 5.373395  | 18.193176 |
| C                                              | 7.520624  | 4.664524  | 14.592079 | H | 13.634258 | 5.845795  | 17.228903 |
| C                                              | 5.485473  | 5.362964  | 22.167521 | H | 13.180161 | 5.818028  | 18.953557 |
| C                                              | 12.268444 | 3.459287  | 18.298269 | H | 14.864903 | 5.46715   | 18.456892 |
| C                                              | 4.802833  | 4.186813  | 24.158467 | C | 14.351421 | 1.61218   | 17.813108 |
| C                                              | 6.469642  | 5.432357  | 21.251917 | H | 14.872533 | 1.097623  | 17.005755 |
| C                                              | 7.967812  | 11.694841 | 21.529169 | H | 14.820775 | 1.272166  | 18.746114 |
| C                                              | 6.738331  | 3.198623  | 12.841197 | C | 10.555146 | 1.696641  | 18.340345 |
| C                                              | 12.920001 | 1.157218  | 17.851125 | H | 10.352135 | 1.553597  | 19.400795 |
| C                                              | 4.355158  | 6.649126  | 23.864352 | H | 9.870915  | 2.434243  | 17.9222   |
|                                                |           |           |           | H | 10.471911 | 0.750562  | 17.814502 |

## Cyclic Voltammetry

### General information

Cyclic voltammograms were recorded at room temperature with a EmStat3-4WE potentiostat (PalmSens). The cell consisted of a glassy carbon working electrode, a Pt wire counter electrode, and an Ag wire pseudo-reference electrode. All potentials are referenced vs. the ferrocene/ferrocenium couple measured as an internal standard.

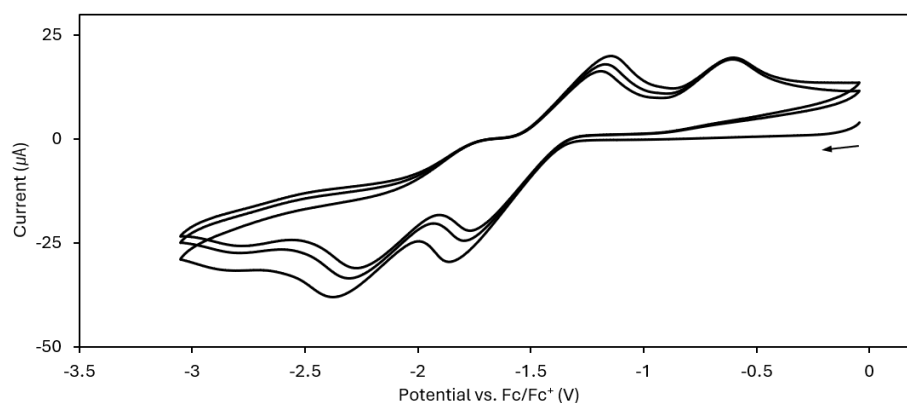

**Figure S7.** Cyclic voltammogram **L** (1.0 mM) in dry THF. Electrolyte: Bu<sub>4</sub>NPF<sub>6</sub> (0.1 M), scan rate = 0.2 V/s. The irreversible reduction of **L** under cyclic voltammetry conditions indicates that the **L**<sup>2-</sup> form is not stable in its free state without coordination to metal centers such as Pd or Ni.

## References

- (1) Fulmer, G. R.; Miller, A. J. M.; Sherden, N. H.; Gottlieb, H. E.; Nudelman, A.; Stoltz, B. M.; Bercaw, J. E.; Goldberg, K. I. *Organometallics* **2010**, *29* (9), 2176-2179.
- (2) Hudnall, T. W.; Moerdyk, J. P.; Bielawski, C. W. *Chem. Commun.* **2010**, *46* (24), 4288-4290.
- (3) Dolomanov, O. V.; Bourhis, L. J.; Gildea, R. J.; Howard, J. A. K.; Puschmann, H. *J. Appl. Crystallogr.* **2009**, *42* (2), 339-341.
- (4) Sheldrick, G. M. *Acta. Cryst.* **2015**, *A71*, 3-8.
- (5) Sheldrick, G. M. *Acta. Cryst.* **2015**, *C71*, 3-8.
- (6) *Gaussian 16, Revision A.03*; Frisch, M. J.; Trucks, G. W.; Schlegel, H. B.; Scuseria, G. E.; Robb, M. A.; Cheeseman, J. R.; Scalmani, G.; Barone, V.; Petersson, G. A.; Nakatsuji, H.; Li, X.; Caricato, M.; Marenich, A. V.; Bloino, J.; Janesko, B. G.; Gomperts, R.; Mennucci, B.; Hratchian, H. P.; Ortiz, J. V.; Izmaylov, A. F.; Sonnenberg, J. L.; Williams-Young, D.; Ding, F.; Lipparini, F.; Egidi, F.; Goings, J.; Peng, B.; Petrone, A.; Henderson, T.; Ranasinghe, D.; Zakrzewski, V. G.; Gao, J.; Rega, N.; Zheng, G.; Liang, W.; Hada, M.; Ehara, M.; Toyota, K.; Fukuda, R.; Hasegawa, J.; Ishida, M.; Nakajima, T.; Honda, Y.; Kitao, O.; Nakai, H.; Vreven, T.; Throssell, K.; Jr., J. A. M.; Peralta, J. E.; Ogliaro, F.; Bearpark, M. J.; Heyd, J. J.; Brothers, E. N.; Kudin, K. N.; Staroverov, V. N.; Keith, T. A.; Kobayashi, R.; Normand, J.; Raghavachari, K.; Rendell, A. P.; Burant, J. C.; Iyengar, S. S.; Tomasi, J.; Cossi, M.; Millam, J. M.; Klene, M.; Adamo, C.; Cammi, R.; Ochterski, J. W.; Martin, R. L.; Morokuma, K.; Farkas, O.; Foresman, J. B.; Fox, D. J., Gaussian, Inc., Wallingford CT, 2016.
- (7) Zhao, Y.; Truhlar, D. G. *Theor. Chem. Acc.* **2007**, *120* (1-3), 215-241.
- (8) Weigend, F.; Ahlrichs, R. *Phys. Chem. Chem. Phys.* **2005**, *7* (18), 3297-3305.
- (9) (a) Foster, J. P.; Weinhold, F. *J. Am. Chem. Soc.* **2002**, *102* (24), 7211-7218. (b) Reed, A. E.; Weinhold, F. *J. Chem. Phys.* **1983**, *78* (6), 4066-4073.
